# Supplementary material for: Protein corona-induced modification of silver nanoparticle aggregation in simulated gastric fluid
Source: Royal Society of Chemistry journal article supplement (doi:10.1039/c6en00278a), 2016-01-01
Supplement: c6en00278a1.pdf [file c6en00278a1.pdf]

## Supplementary Information

### Protein Corona-Induced Modification of Silver Nanoparticle Aggregation in Simulated Gastric Fluid

Andrew P. Ault<sup>a,b\*</sup>, Diana I. Stark<sup>a</sup>, Jessica L. Axson<sup>a</sup>, Justin N. Keeney<sup>b</sup>, Andrew D. Maynard<sup>a†</sup>,  
Ingrid Bergin<sup>c</sup>, Martin Philbert<sup>a</sup>

<sup>1</sup>*Department of Environmental Health Sciences, University of Michigan, Ann Arbor, MI*

<sup>2</sup>*Department of Chemistry, University of Michigan, Ann Arbor, MI*

<sup>3</sup>*Unit for Laboratory Animal Medicine, School of Medicine, University of Michigan, Ann Arbor, MI*

<sup>†</sup>*Current address: School for the Future of Innovation in Society Arizona State University, Tempe, AZ*

\*Corresponding author: Andrew P. Ault, [aulta@umich.edu](mailto:aulta@umich.edu), 734-763-4212

#### Initial Particle Characterization

The initial characterization of each AgNP in MilliQ water (18 M $\Omega$ ) performed using a suite techniques (Table S1). NTA and DLS were used to determine hydrodynamic diameter. Zeta potential (ZP) was determined along with DLS, showing no aggregation of particles in stock solution. TEM was used to determine particle geometric diameter and was measured from the images using Image J software. The NTA measured hydrodynamic diameter for each particle in water were used in Figures 1 and 2 for comparison to initial particle diameter. The TEM measured geometric diameter for each particle in water and subsequently dried on a TEM grid, were used in Figure 3 for comparison to initial particle diameter. The mass concentrations of each of the AgNP were measured for the consortium initially by the Nanotechnology Characterization Laboratory (NCL) in 2011.

**Table S1.** Properties (hydrodynamic diameter, zeta potential and projected area diameter) of initial AgNP in water measured using NTA and DLS, and zeta potential measured using DLS/ZP.

| Method                         | C20          | P20           | C110          | P110         |
|--------------------------------|--------------|---------------|---------------|--------------|
| NTA (nm) <sup>†</sup>          | 32 (± 1)     | 29 (± 2)      | 113 (± 4)     | 107 (± 4)    |
| DLS (nm) <sup>†</sup>          | 24 (± 1)     | 30 (± 3)      | 105 (± 2)     | 117 (± 8)    |
| TEM (nm) <sup>†</sup>          | 21 (± 4)     | 20 (± 3)      | 114 (± 9)     | 127 (± 15)   |
| TEM (nm) <sup>‡</sup>          | 20 (±3)      | 21 (± 4)      | 111 (± 9)     | 114 (± 8)    |
| ZP (mV) <sup>†</sup>           | -40 (± 3)    | -25 (± 17)    | -48 (± 12)    | -35 (± 12)   |
| Mass Conc. (mg/g) <sup>‡</sup> | 1.1 (± 0.07) | 1.09 (± 0.06) | 0.98 (± 0.06) | 1.1 (± 0.06) |

<sup>†</sup>Also measured in Axson et al. 2015 and Bergin et al. 2016

<sup>‡</sup>Measured by the Nanotechnology Characterization Laboratory (NCL) 2011

### NTA of Pepsin in SGF

SGF-P at each pH was characterized in the NTA prior to each trial (before addition of nanoparticles) and over a 2 hour time period to ensure that the pepsin was not significantly changing size within the SGF (Figure S1). Pepsin was determined not to interfere with the AgNP as it is both larger than the AgNPs and an order of magnitude lower in concentration, as shown Figure 2.

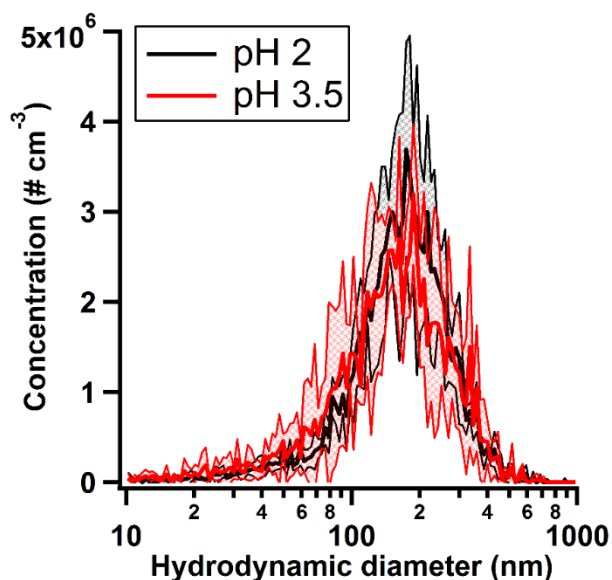

**Figure S1.** Pepsin size distributions measured using the NTA in SGF-P pH 2 and 3.5.

## One Hour NTA Experiments

Peak hydrodynamic diameter for each AgNP determined from size distribution collected using the NTA in SGF and SGF-P for each pH. Samples were collected from the vessel at time points of 1, 10, 30, and 60 minutes during each experiment, as well as in water, to observe changes in particles during digestion in the stomach.

**Table S2.** The peak hydrodynamic diameter measured using NTA for all four AgNP in water and SGF/SGF-P at each pH at specified time periods during a 60 minute experiment.

| Media  | Time (min) | C20 (nm) |       | P20 (nm) |       | C110 (nm) |       | P110 (nm) |       |
|--------|------------|----------|-------|----------|-------|-----------|-------|-----------|-------|
|        |            | SGF      | SGF-P | SGF      | SGF-P | SGF       | SGF-P | SGF       | SGF-P |
| pH 2   | 1          | 87       | 254   | 76       | 167   | 132       | 155   | 135       | 145   |
|        | 10         | 119      | 263   | 69       | 174   | 140       | 159   | 135       | 183   |
|        | 30         | 150      | 278   | 58       | 181   | 153       | 164   | 138       | 192   |
|        | 60         | 197      | 260   | 57       | 202   | 162       | 170   | 137       | 210   |
| pH 3.5 | 1          | 74       | 141   | 61       | 148   | 129       | 156   | 120       | 153   |
|        | 10         | 74       | 136   | 65       | 154   | 136       | 156   | 122       | 156   |
|        | 30         | 62       | 145   | 58       | 175   | 144       | 160   | 129       | 158   |
|        | 60         | 51       | 156   | 48       | 188   | 140       | 168   | 127       | 165   |
| pH 5   | 1          | 72       | 106   | 46       | 80.7  | 124       | 144   | 123       | 142   |
|        | 10         | 66       | 124   | 48       | 111   | 126       | 145   | 121       | 146   |
|        | 30         | 58       | 144   | 43       | 140   | 130       | 156   | 121       | 142   |
|        | 60         | 54       | 141   | 49       | 162   | 138       | 164   | 119       | 137   |

### TEM Images of AgNP digested in SGF-P

TEM images of each of the AgNP reacted for 10 minutes in SGF-P at each pH and in water. Due to the difficulty in stopping the acidic reaction at earlier time points and damaging the TEM grid at longer time points, the 10 minute reaction time was used to examine aggregate formation.

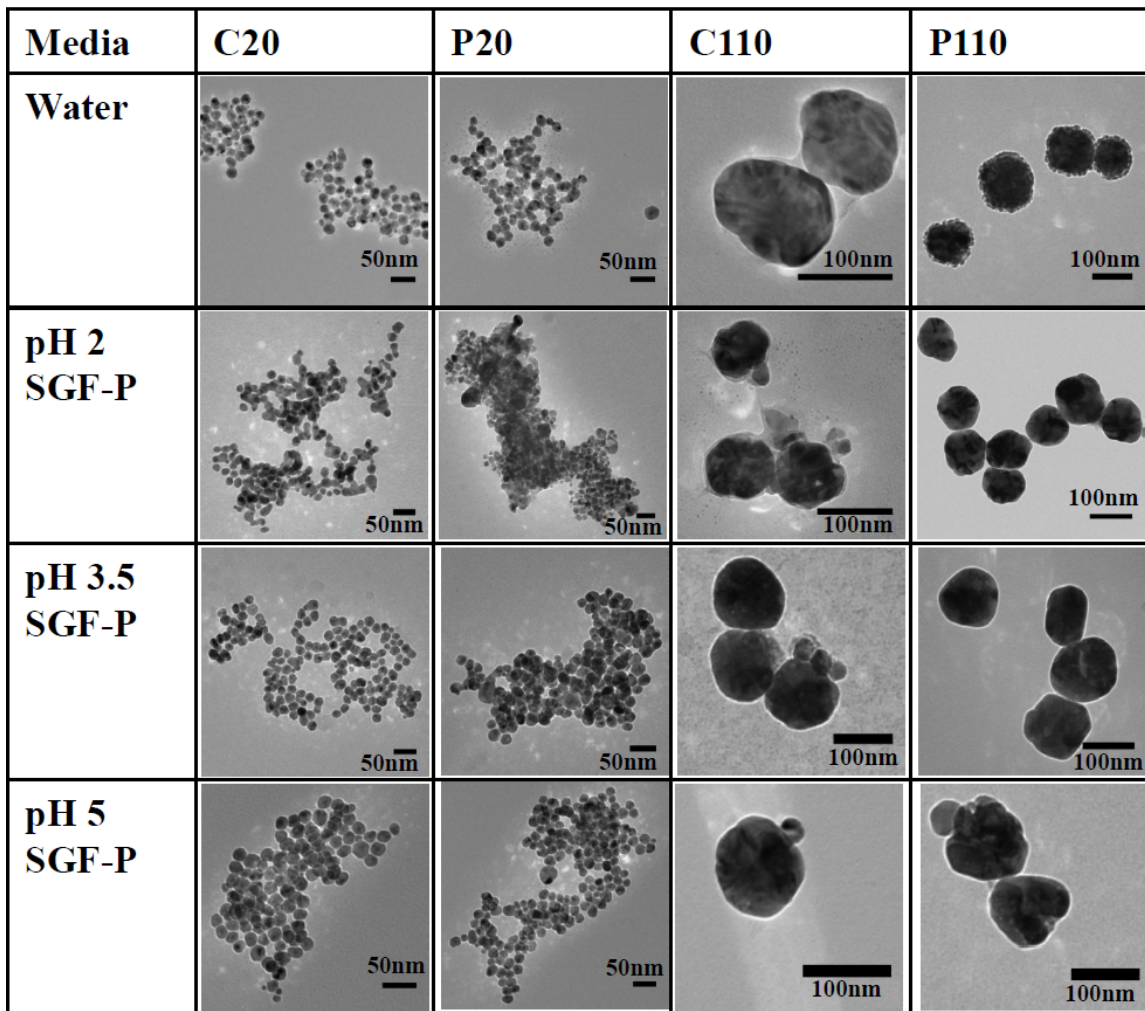

**Figure S2.** TEM images of all four AgNP in water for initial characterization and after 10 minutes of incubation in SGF-P at each pH.

## Pepsin Tertiary Structure

Changes in pepsin tertiary structure in the presence of each AgNP in SGF at each pH was determine using UV-vis.

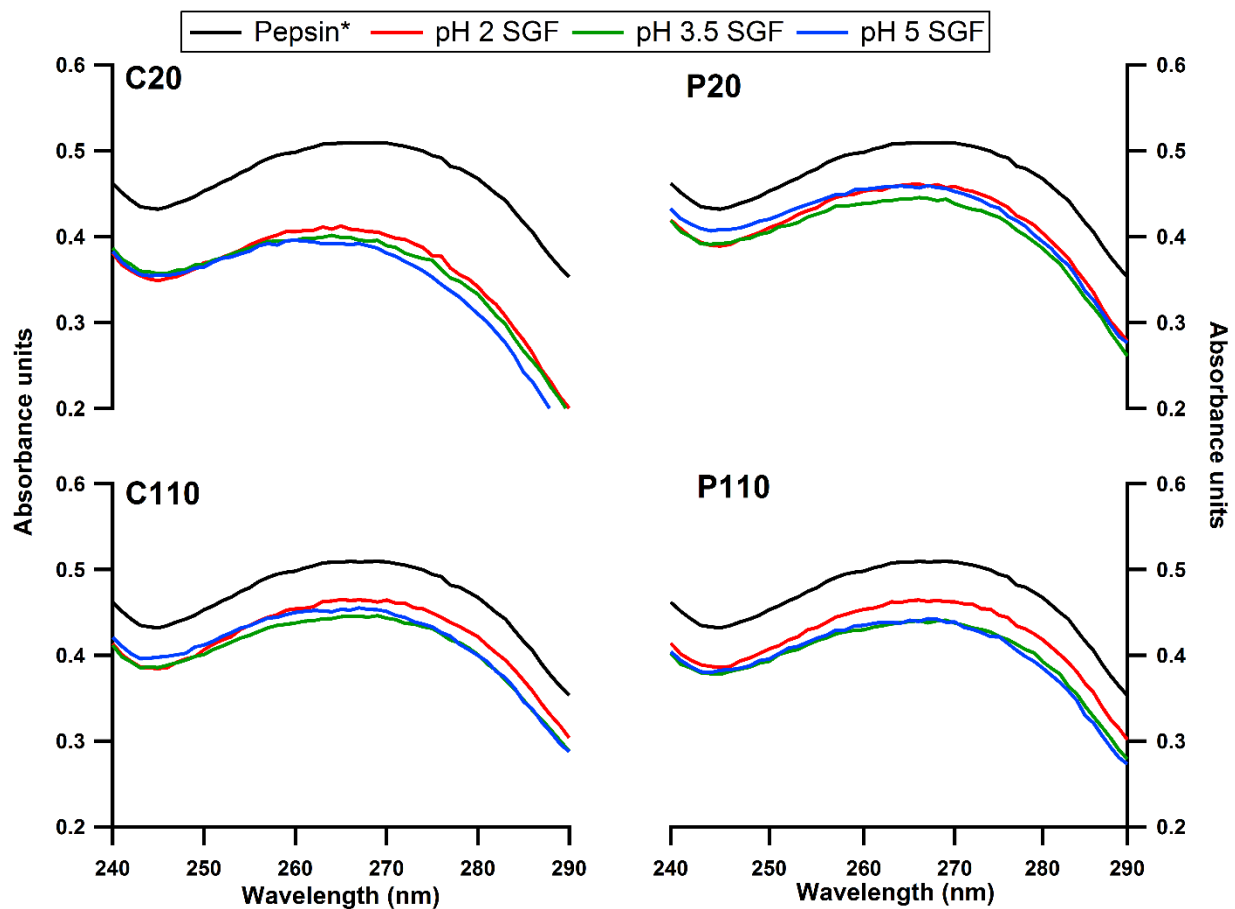

**Figure S3.** UV-vis spectra of pepsin after undergoing the Anson method for all four AgNP.

## Influence of AgNP on Pepsin Secondary Structure

CD spectra were collected in the far-UV region from 190 - 250 nm and used to determine the changes in pepsin secondary structure upon the introduction of AgNP. Figure S4 shows the CD spectra for each particle type under the pH 2 and pH 5 conditions at 3 molar ratios. The calculated percentages of secondary structural elements are given in Table S3.

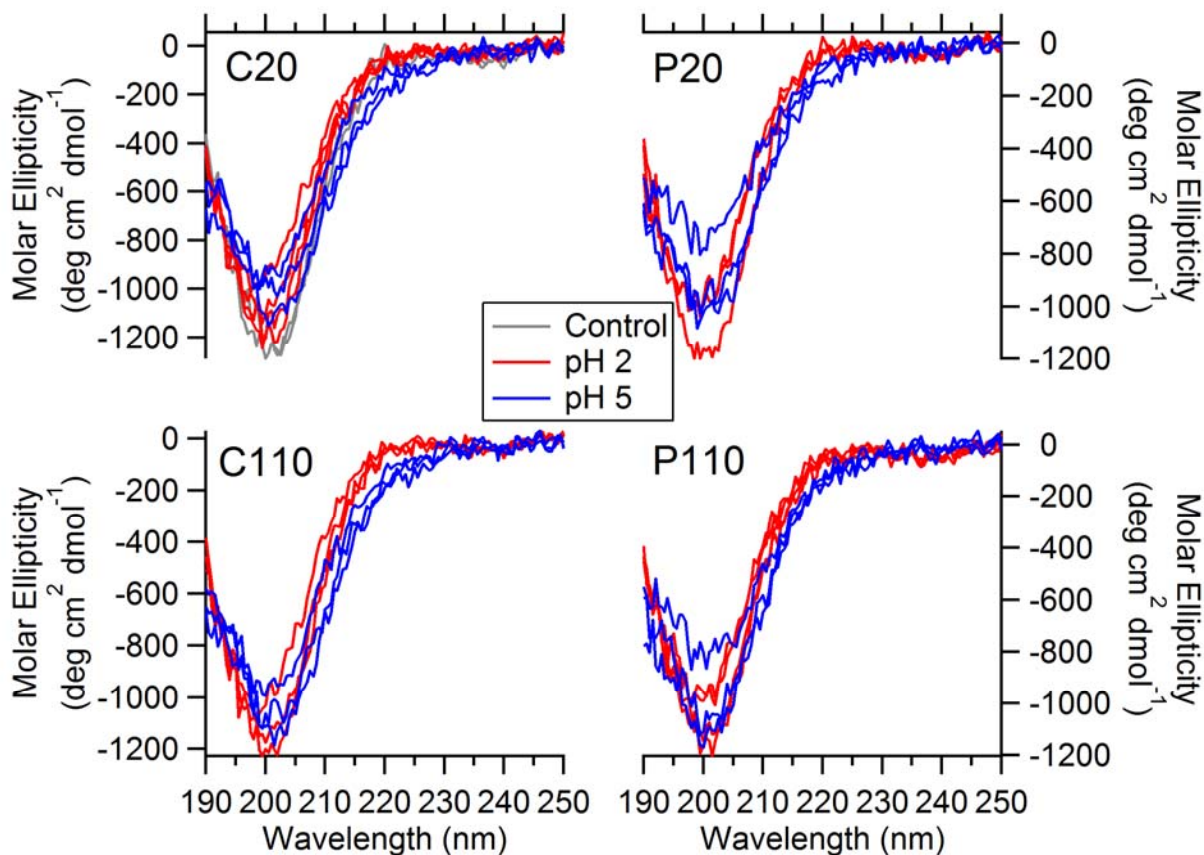

**Figure S4:** Molar ellipticity at 3 different AgNP:pepsin ratios and two different acidities. Control spectra are shown on the citrate 20 panel.

**Table S3.** The percentage of secondary structural elements in present for pepsin after incubation for 60 minutes with all four AgNP in SGF-P at pH 2 and pH 5.

| Sample  | Molar ratio<br>AgNP:pepsin | pH 2                |                    |      |           | pH 5                |                    |      |           |
|---------|----------------------------|---------------------|--------------------|------|-----------|---------------------|--------------------|------|-----------|
|         |                            | $\alpha$ -<br>Helix | $\beta$ -<br>Sheet | Turn | Unordered | $\alpha$ -<br>Helix | $\beta$ -<br>Sheet | Turn | Unordered |
| Control | -                          | 2.70                | 40.9               | 19.4 | 37.1      | 2.70                | 40.7               | 19.4 | 37.3      |
| C20     | 158 : 1                    | 2.70                | 40.9               | 19.4 | 37.0      | 2.60                | 40.9               | 19.4 | 37.1      |
|         | 63.0 : 1                   | 2.70                | 41.1               | 19.5 | 36.8      | 2.60                | 41.1               | 19.5 | 36.8      |
|         | 31.5 : 1                   | 2.70                | 40.9               | 19.4 | 37.0      | 2.80                | 41.0               | 19.4 | 36.8      |

|             |          |      |      |      |      |      |      |      |      |
|-------------|----------|------|------|------|------|------|------|------|------|
| <b>P20</b>  | 158 : 1  | 2.70 | 40.9 | 19.4 | 37.0 | 2.60 | 40.9 | 19.4 | 37.1 |
|             | 63.0 : 1 | 2.70 | 40.9 | 19.4 | 37.0 | 2.60 | 40.7 | 19.4 | 37.3 |
|             | 31.5 : 1 | 2.60 | 41.1 | 19.5 | 36.7 | 2.70 | 40.8 | 19.4 | 37.1 |
| <b>C110</b> | 158 : 1  | 2.70 | 41.1 | 19.5 | 36.9 | 2.70 | 40.9 | 19.4 | 37.1 |
|             | 63.0 : 1 | 2.70 | 40.9 | 19.4 | 37.0 | 2.70 | 40.7 | 19.3 | 37.4 |
|             | 31.5 : 1 | 2.70 | 40.9 | 19.4 | 37.1 | 2.60 | 40.6 | 19.2 | 37.6 |
| <b>P110</b> | 158 : 1  | 2.60 | 41.2 | 19.5 | 36.8 | 2.70 | 40.8 | 19.4 | 37.2 |
|             | 63.0 : 1 | 2.60 | 41.0 | 19.4 | 37.0 | 2.50 | 40.8 | 19.5 | 37.1 |
|             | 31.5 : 1 | 2.60 | 40.7 | 19.3 | 37.3 | 2.70 | 40.8 | 19.4 | 37.3 |

### Four Hour NTA Trials

NTA trials were performed using fasted SGF and SGF-P on C20 and P20 to observe any further changes in the particles. Results indicated that C20 and P20 remained aggregated for up to 4 hours after introduction into the gastric system (Figure S4).

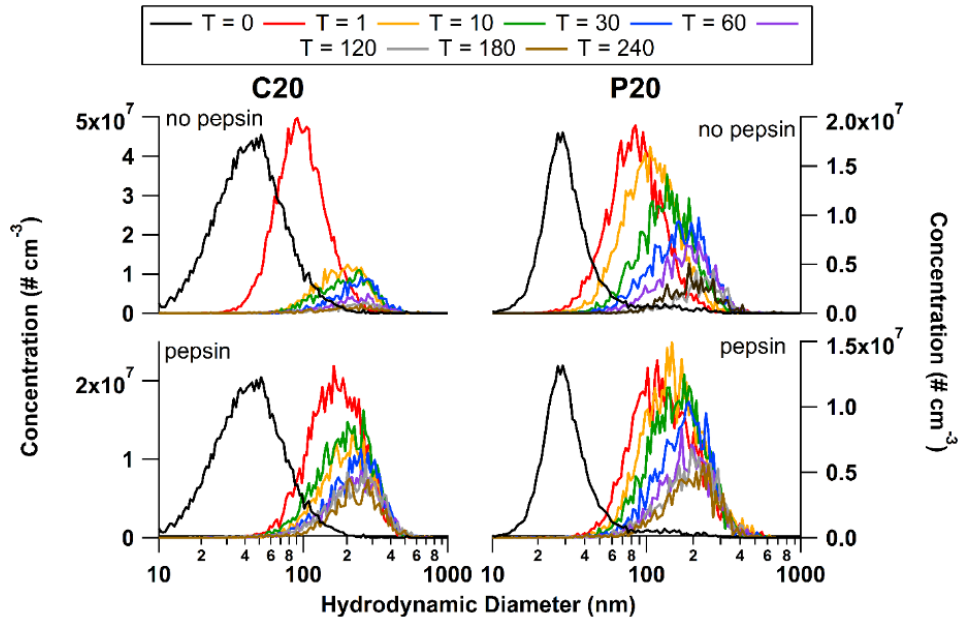

**Figure S4.** C20 and P20 size distributions collected using NTA for pH 2 SGF and SGF-P during a 4 hour experiment.
